# Supplementary material for: Amine-functionalized siloxane oligomer facilitated synthesis of subnanometer colloidal Au particles
Source: Royal Society of Chemistry journal article supplement (doi:10.1039/c4ta05954a), 2014-11-25
Supplement: c4ta05954a1.pdf [file c4ta05954a1.pdf]

Supporting information for

**Amine-Functionalized Siloxane Oligomer Facilitated Synthesis of Subnanometer Colloidal Au Particles.**

Zhen Wang, Evgeny V. Beletskiy, Sungsik Lee, Yuyang Wu, Tiehu Li, Mayfair C. Kung, and Harold H. Kung.

**Contents**

Fig. S-1. NMR of N-PMHS **IV**

Fig. S-2. NMR of N-SiH-PMHS **V**

Fig. S-3. NMR of Me-SiH-PMHS **VI**

Fig. S-4. NMR of Compound **VIII**

Fig. S-5. NMR of Au(THT)Cl and N-PMHS and N-SiH-PMHS.

Fig. S-6  $^1\text{H}$  NMR of Et<sub>2</sub>NH interaction with Au(THT)Cl

Fig. S-7.  $^{13}\text{C}$  NMR of  $-\text{CH}_2$  and  $-\text{CH}_3$  attached to nitrogen of amine.

Fig. S-8 HSQC of Au(THT)Cl and NMR of N-PMHS **IV** with Amine/Au=10

Fig. S-9 HSQC of Au(THT)Cl and NMR of N-PMHS **IV** with Amine/Au=2.5

Fig. S-10  $^1\text{H}$  NMR of Au(THT)Cl and NMR of N-PMHS **IV** with Amine/Au=2.5 with and without addition of triethyl silane.

Fig. S-11 STEM images of Au-Me-SiH-PMHS

Fig. S-12 DLS of samples **a-d**

Fig. S-13 SAXS of sample **a**

Fig. S-14 XANES spectrum of samples **a** and **e** and gold foil.

Fig. S-15 NMR spectrum of the products of catalytic conversion of p-nitrobenzaldehyde catalyzed by sample **a**.

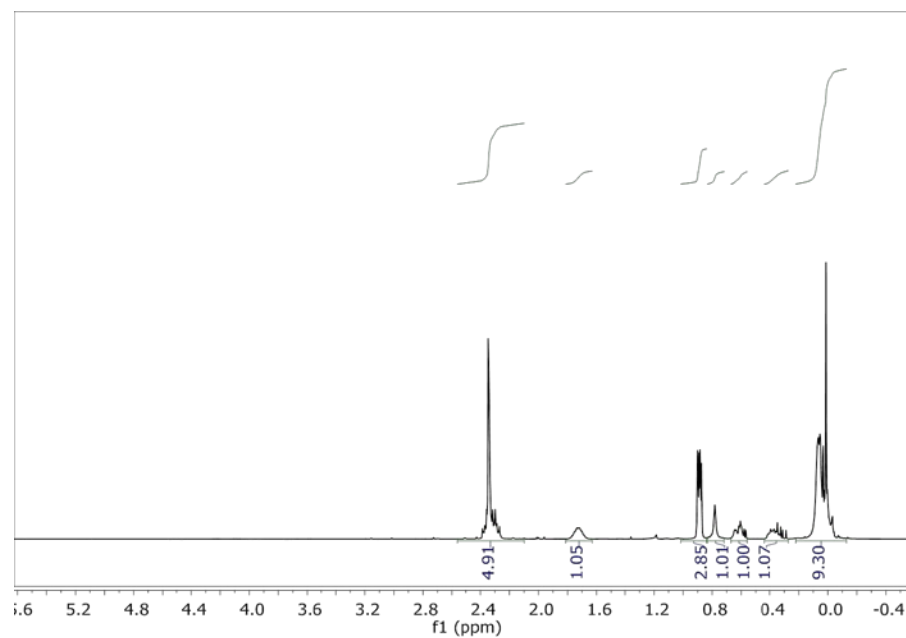

Figure S-1a. <sup>1</sup>H NMR of N-PMHS IV.

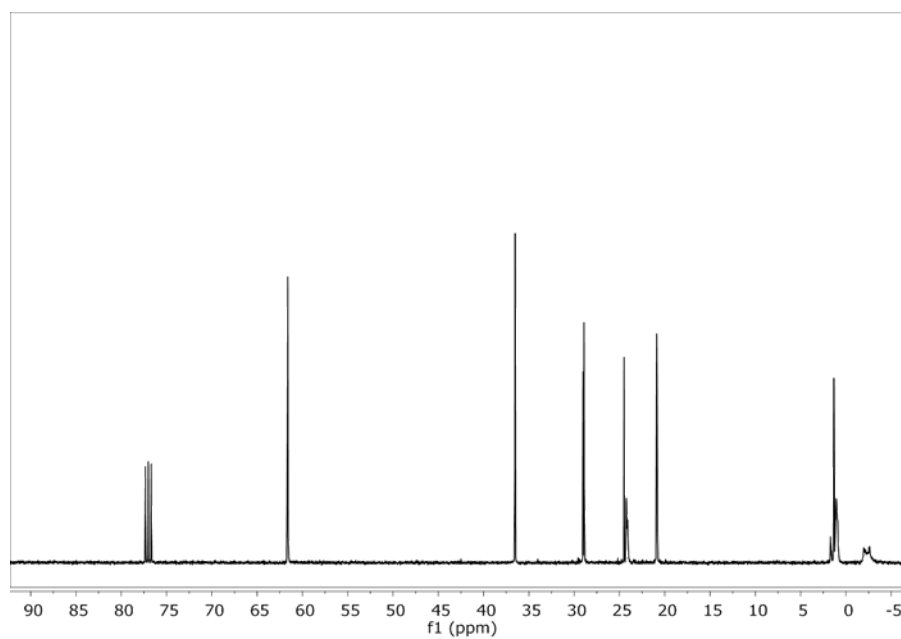

Figure S-1b. <sup>13</sup>C NMR of N-PMHS IV.

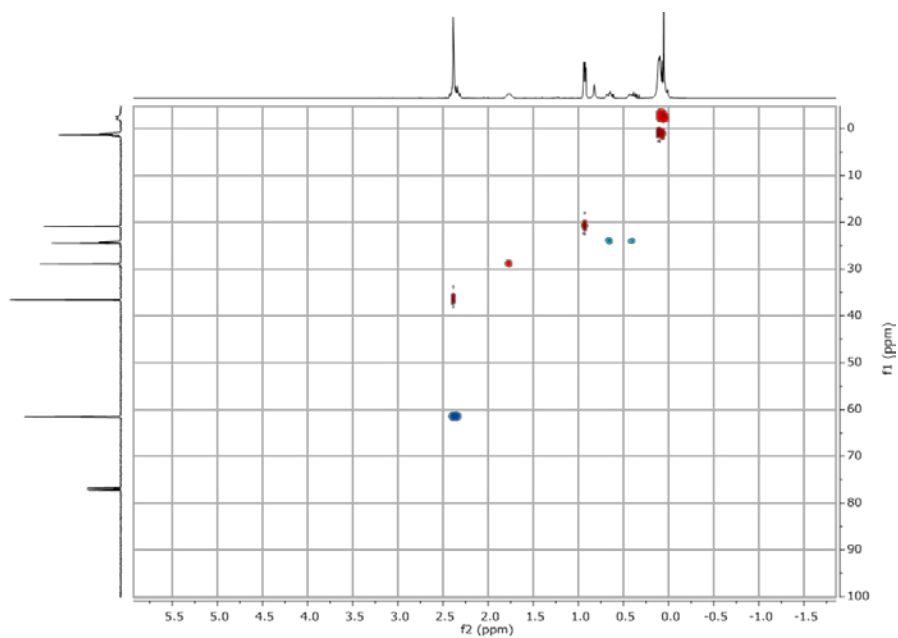

Figure S-1c. HSQCAD of N-PMHS IV.

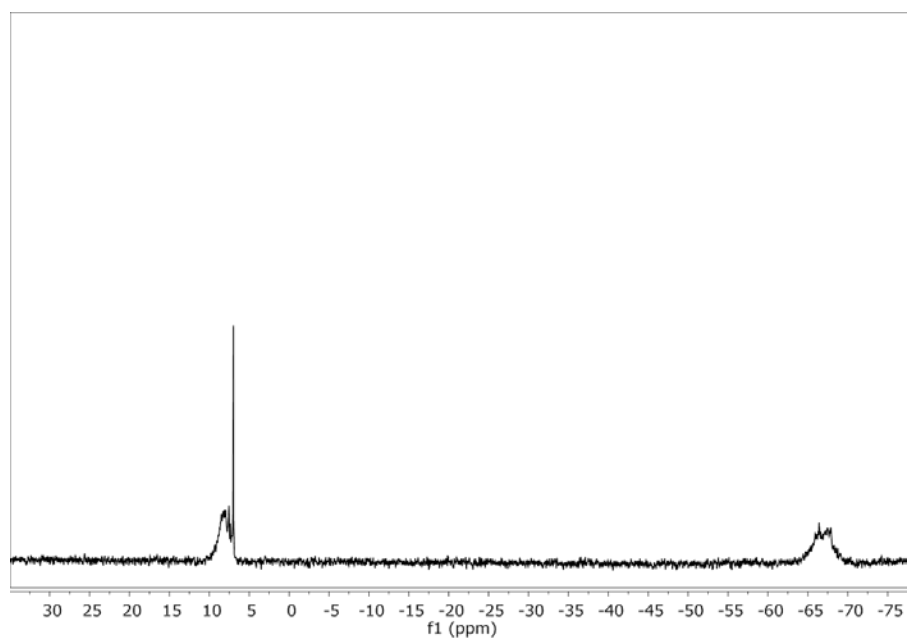

Figure S-1d.  $^{29}\text{Si}$  NMR of -PMHS V.

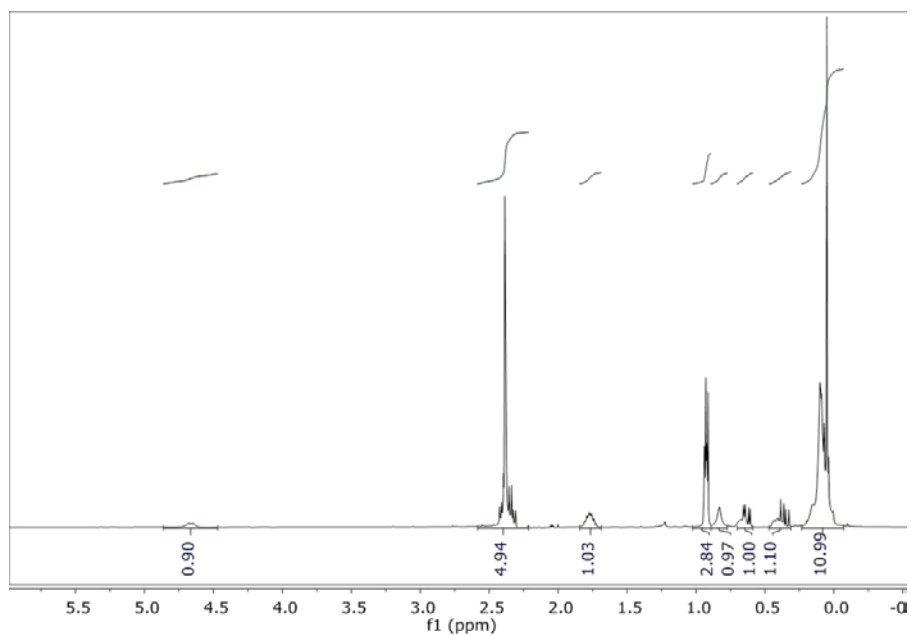

Figure S-2a. <sup>1</sup>H NMR of N-SiH-PMHS V.

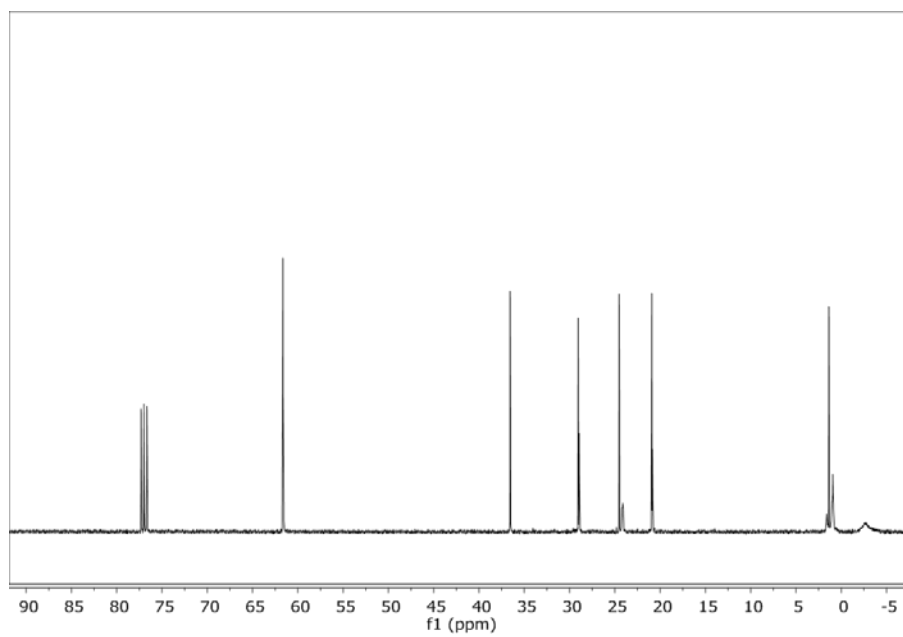

Figure S-2b. <sup>13</sup>C NMR of N-SiH-PMHS V.

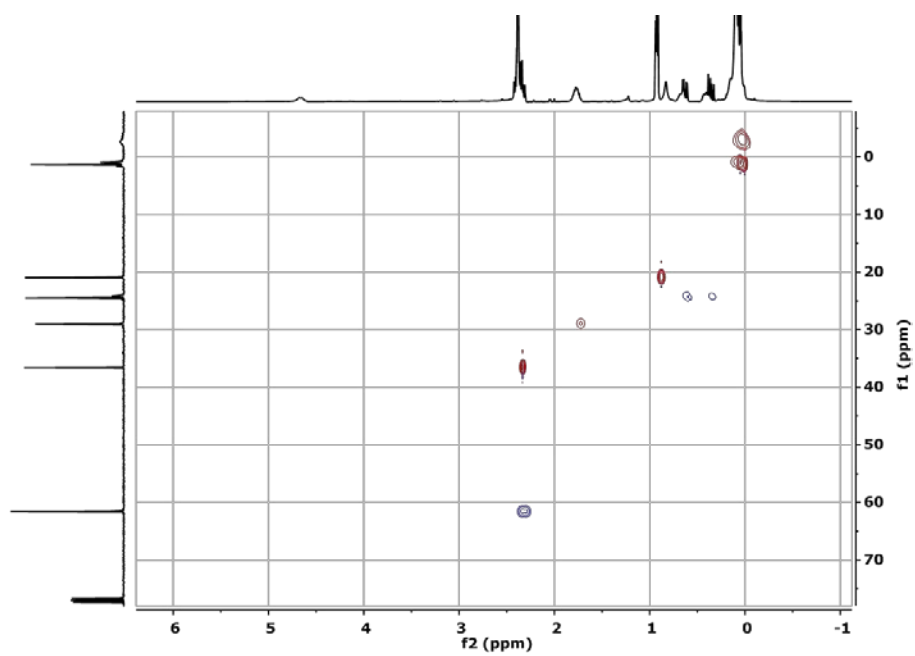

Figure S-2c. HSQCAD of N-SiH-PMHS V.

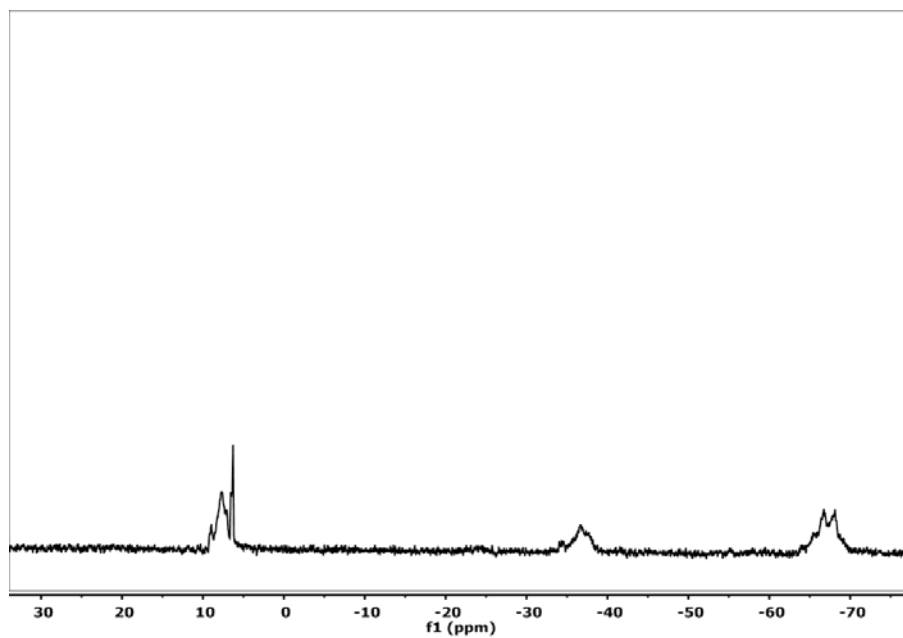

Figure S-2d.  $^{29}\text{Si}$  NMR of N-SiH-PMHS V.

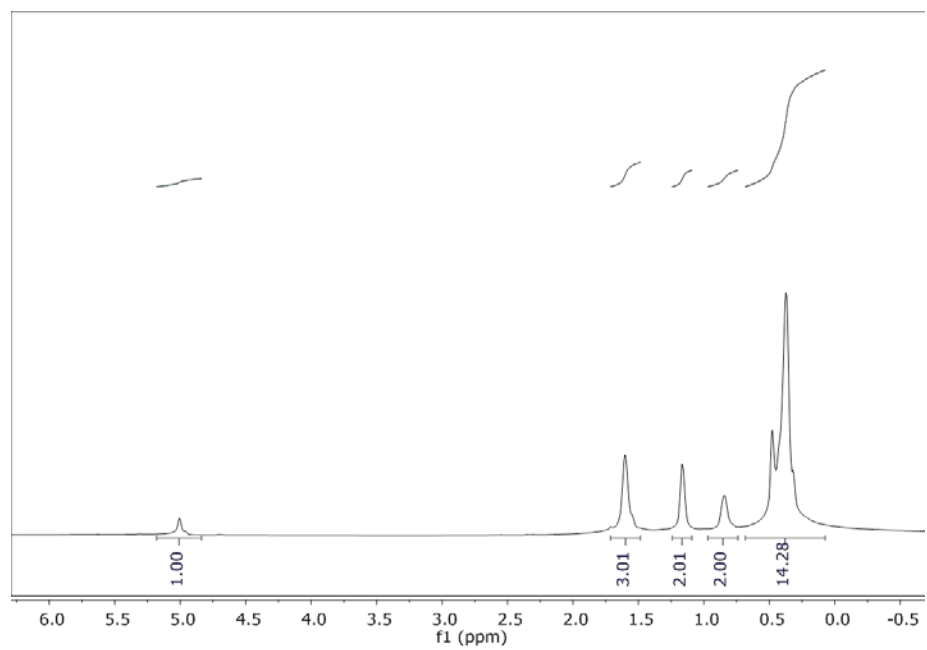

Figure S-3a. <sup>1</sup>H NMR of Me-SiH-PMHS **VI**.

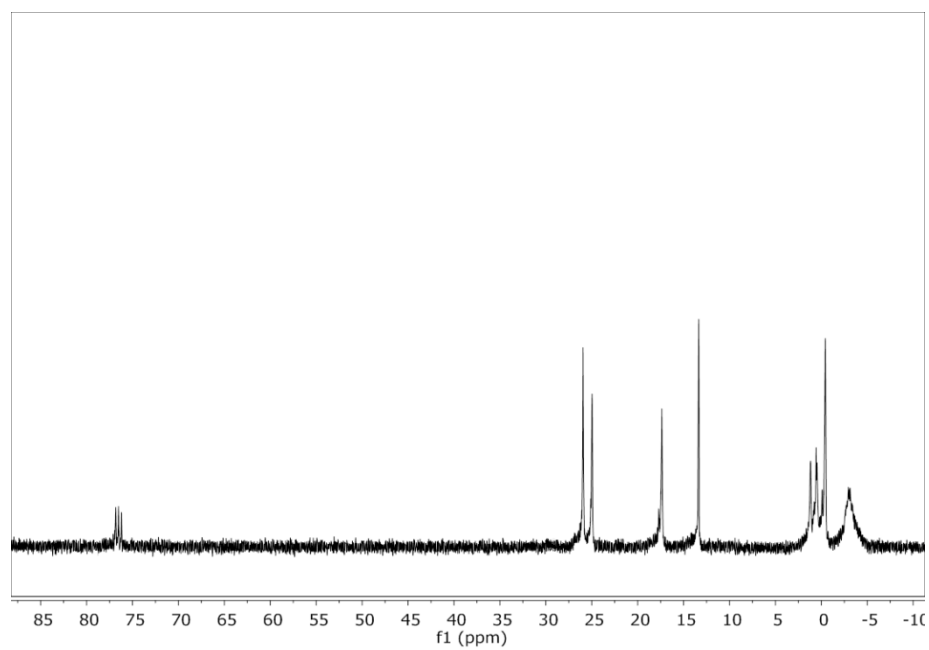

Figure S-3b. <sup>13</sup>C NMR of Me-SiH-PMHS **VI**.

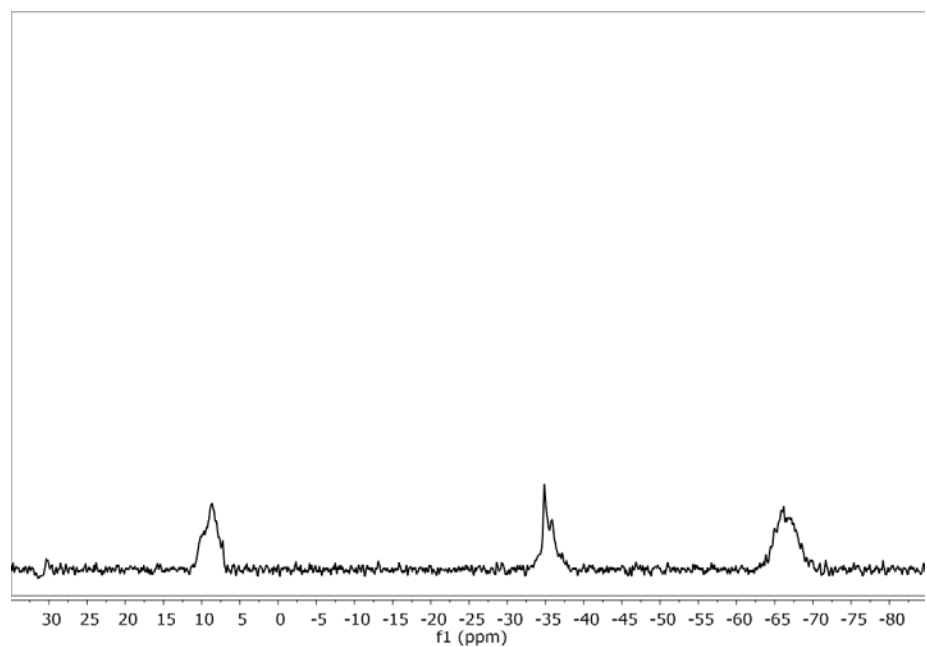

Figure S-3c.  $^{29}\text{Si}$  NMR of Me-SiH-PMHS **VI**.

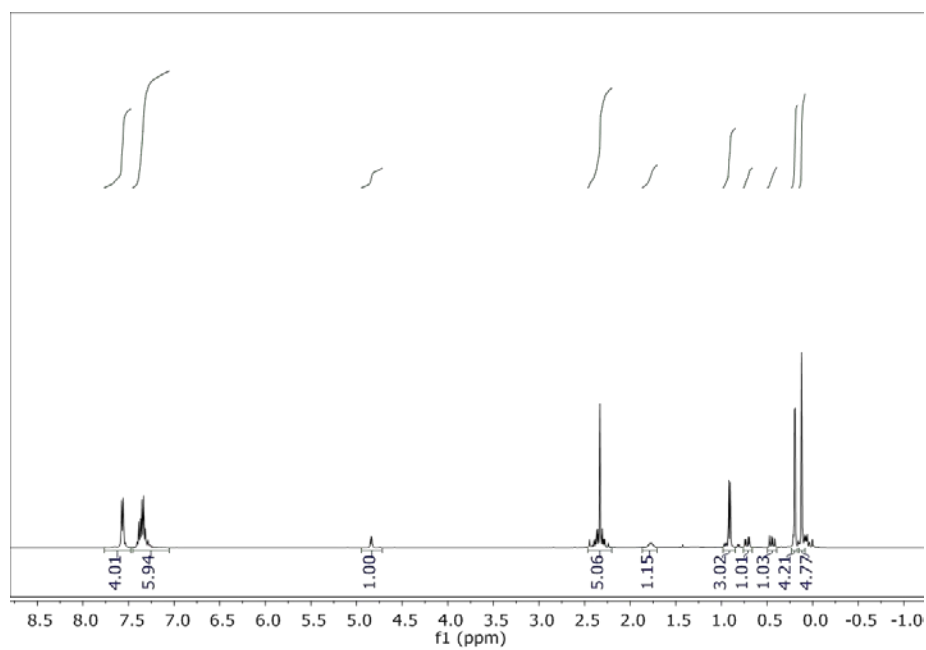

Figure S-4a.  $^1\text{H}$  NMR of Compound **VIII**.

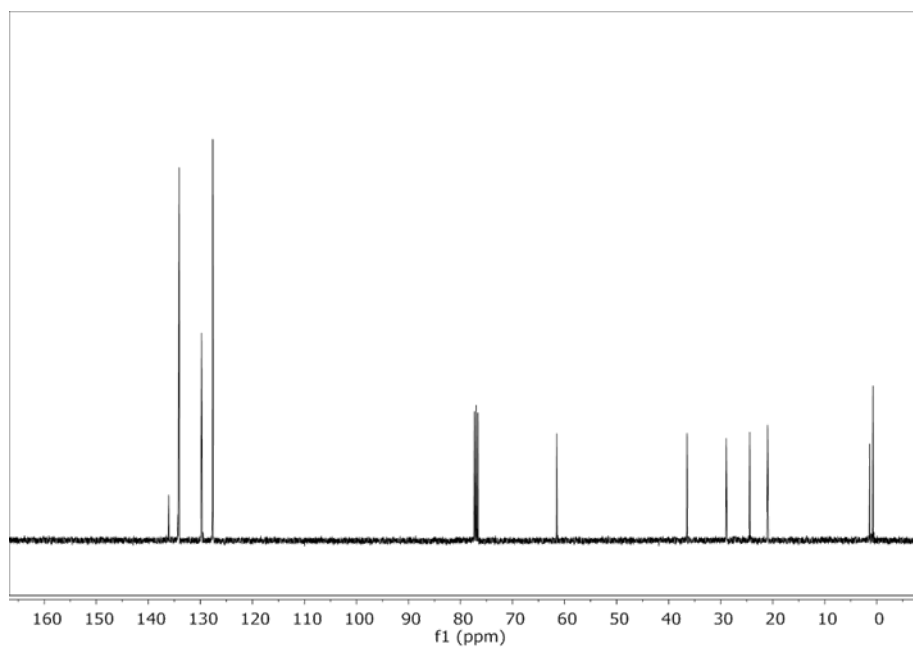

Figure S-4b.  $^{13}\text{C}$  NMR of Compound **VIII**.

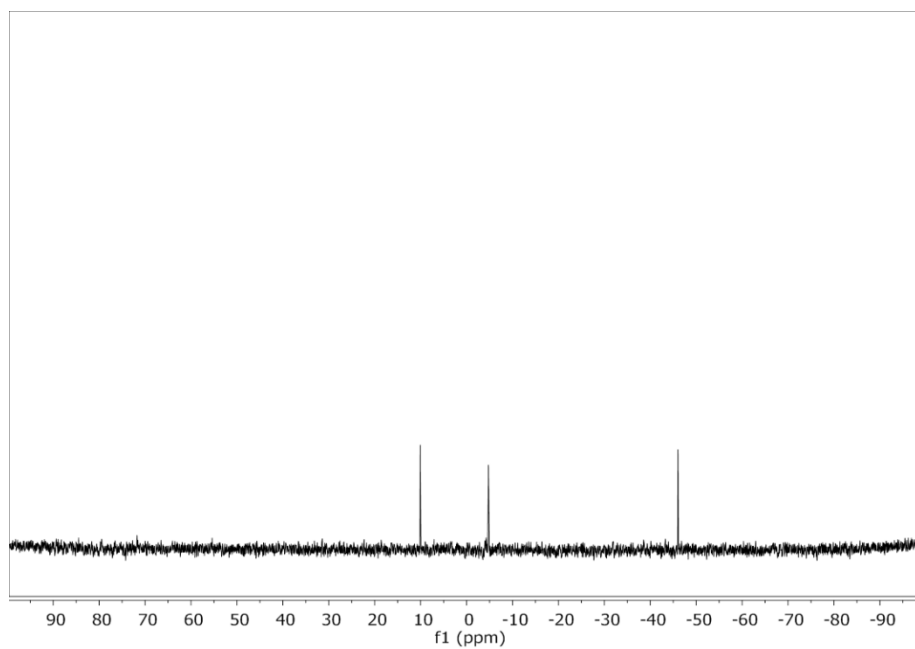

Figure S-4c.  $^{29}\text{Si}$  NMR of Compound **VIII**.



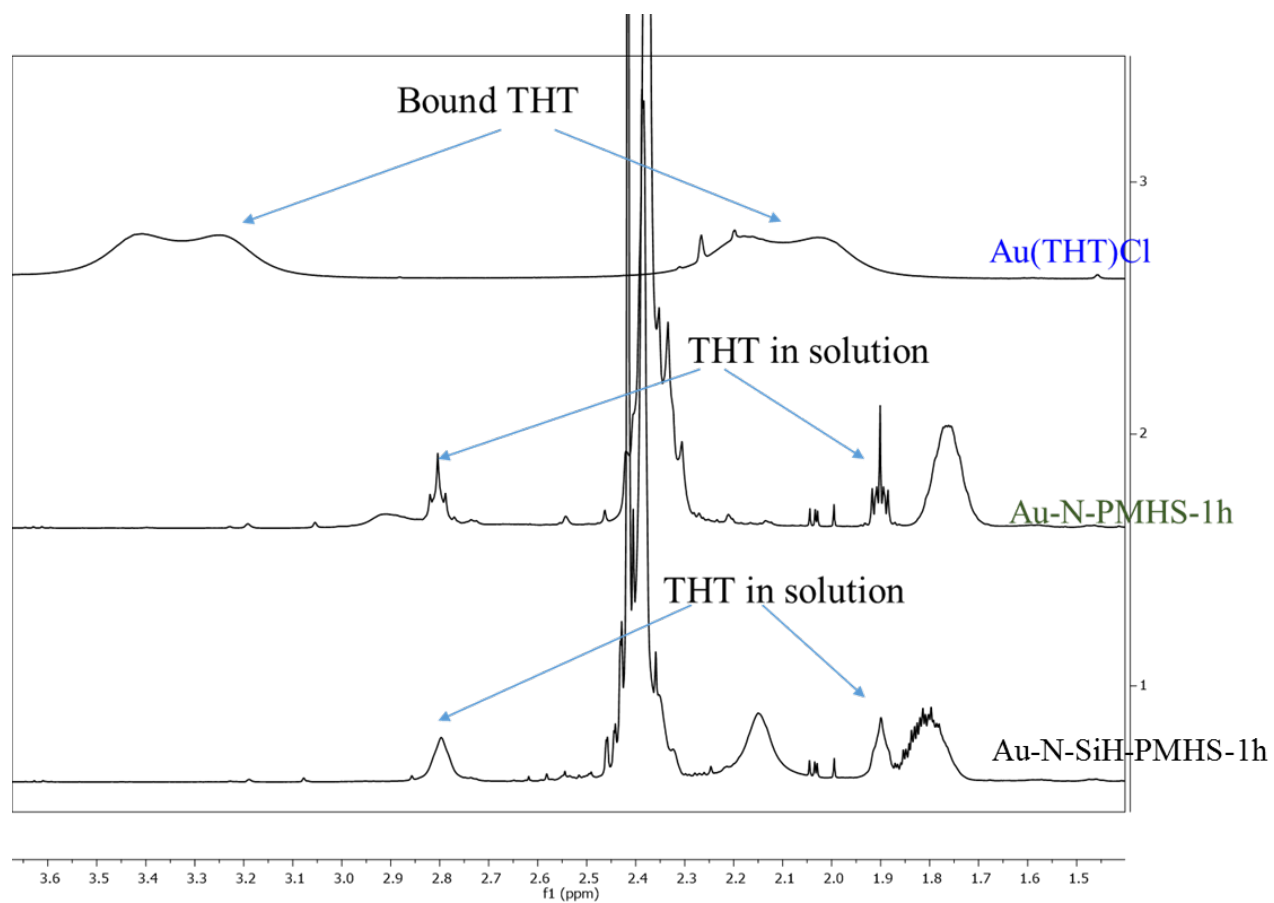

Figure S-5.  $^1\text{H}$  NMR showing bound THT in  $\text{Au}(\text{THT})\text{Cl}$  and unbound THT 1 h after addition of N-PMHS or N-SiH-PMHS.

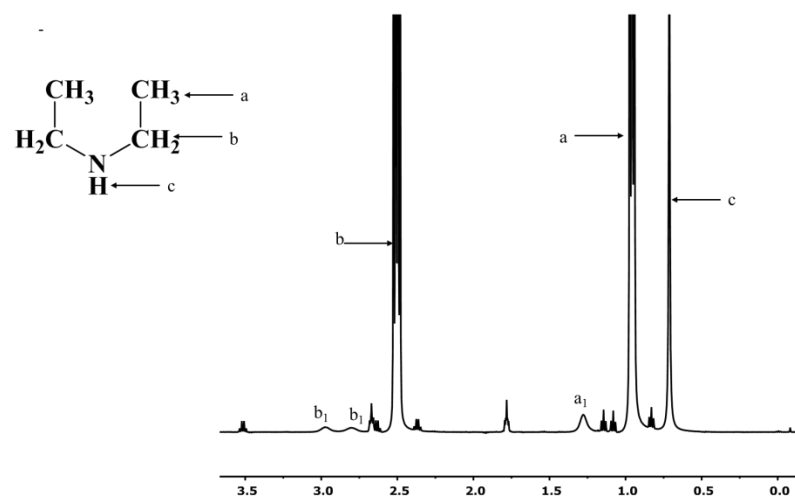

Fig. S-6.  $^1\text{H}$  NMR of mixture containing diethylamine and  $\text{Au}(\text{THT})\text{Cl}$  at a ratio of diethylamine to  $\text{Au}(\text{THT})\text{Cl}$  of 10. Peaks a,b, and c denote resonances of different protons associated with diethylamine in solution. Peaks a1 and b1 are the corresponding protons of diethylamine coordinated to Au. Peak c1 at  $\delta$  6.85 ppm is not shown.

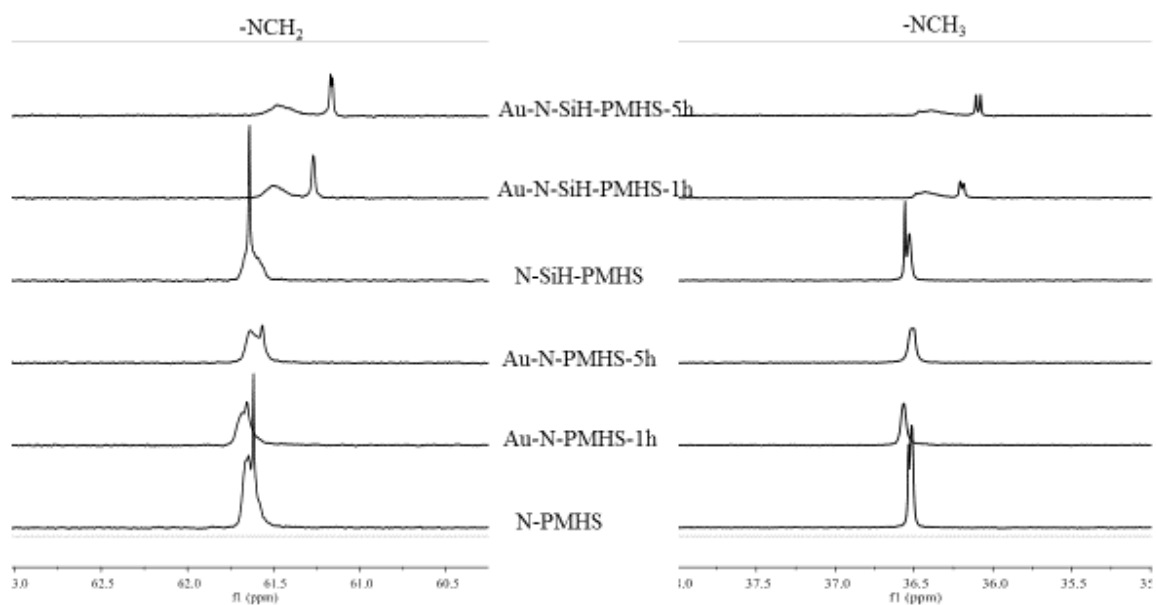

Figure S-7  $^{13}\text{C}$  NMR of  $\text{CH}_3$  and  $\text{CH}_2$  attached to the nitrogen of amine in various mixtures.

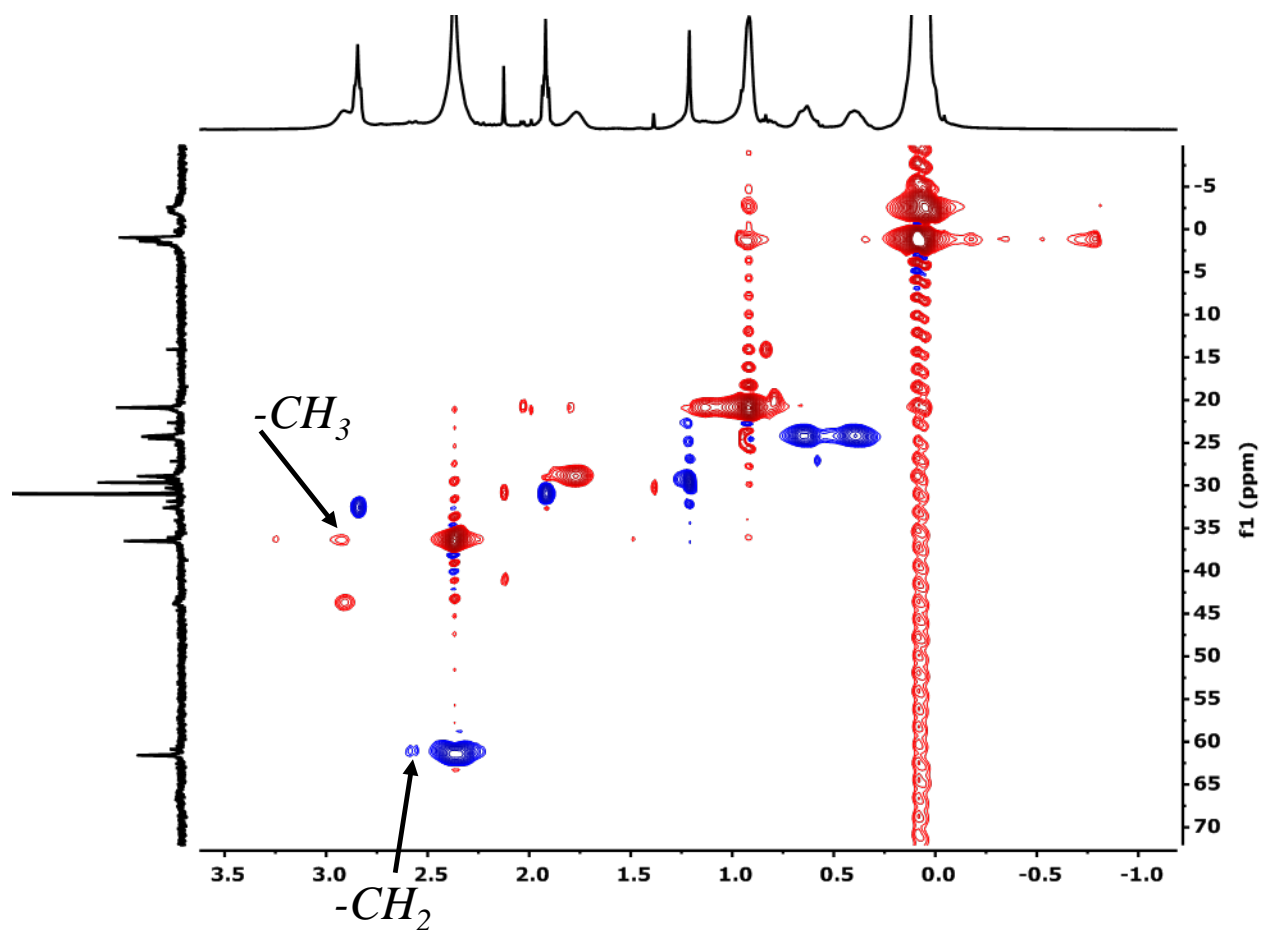

Figure S-8. HSQC of Au-N-PMHS-1h at amine to Au ratio of 10. The broad shoulder at  $\delta$  2.9 ppm is assigned to  $-CH_3$  attached to N atom of amine coordinated to Au.

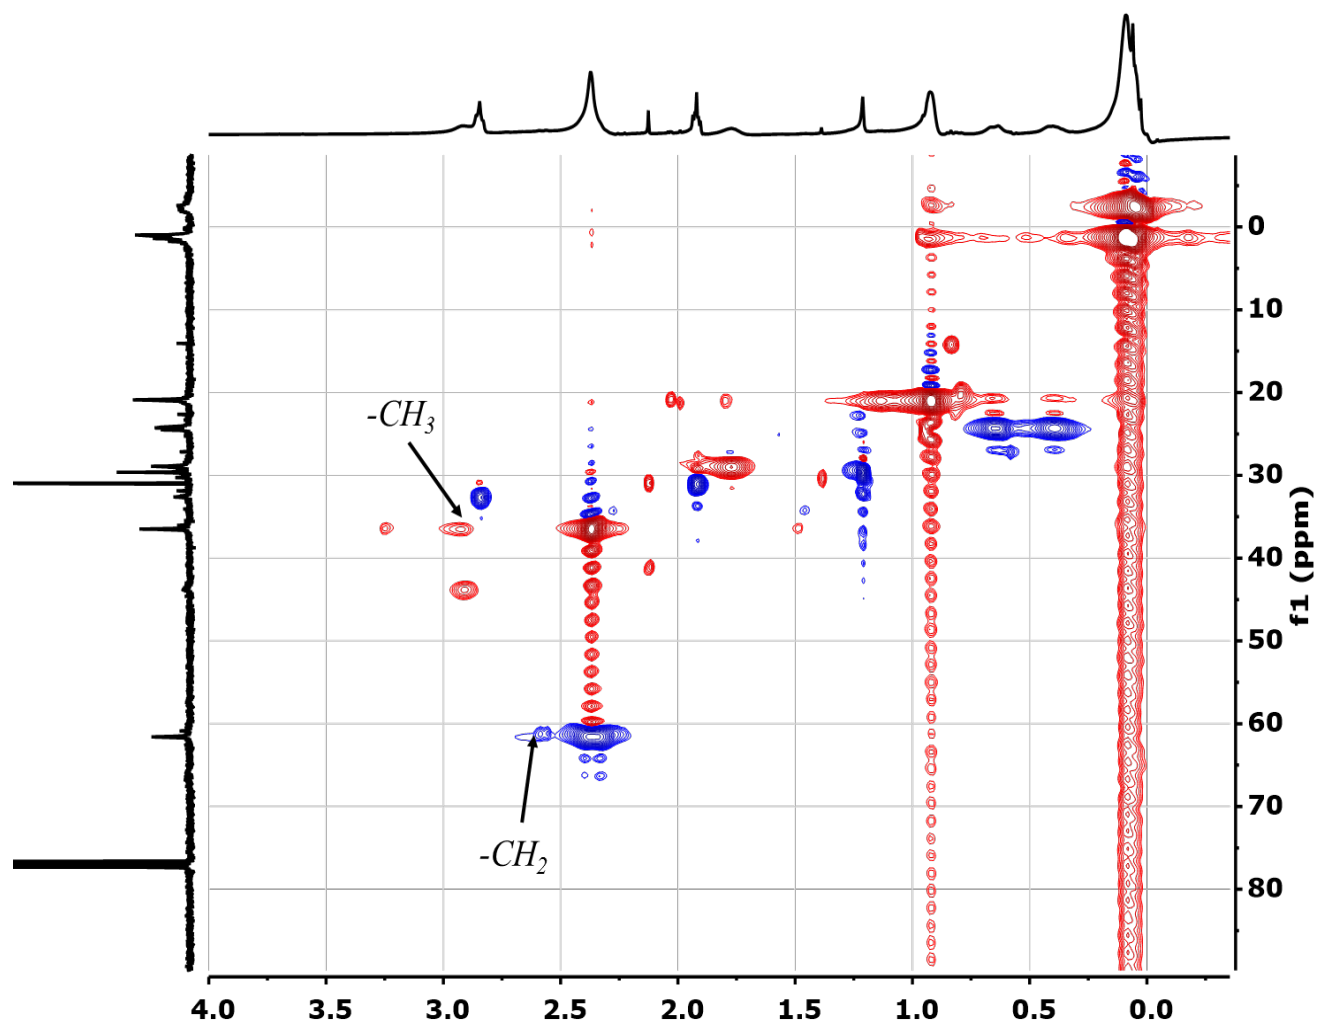

Figure S-9. HSQC of Au-N-PMHS-1h at amine to Au ratio of 2.5

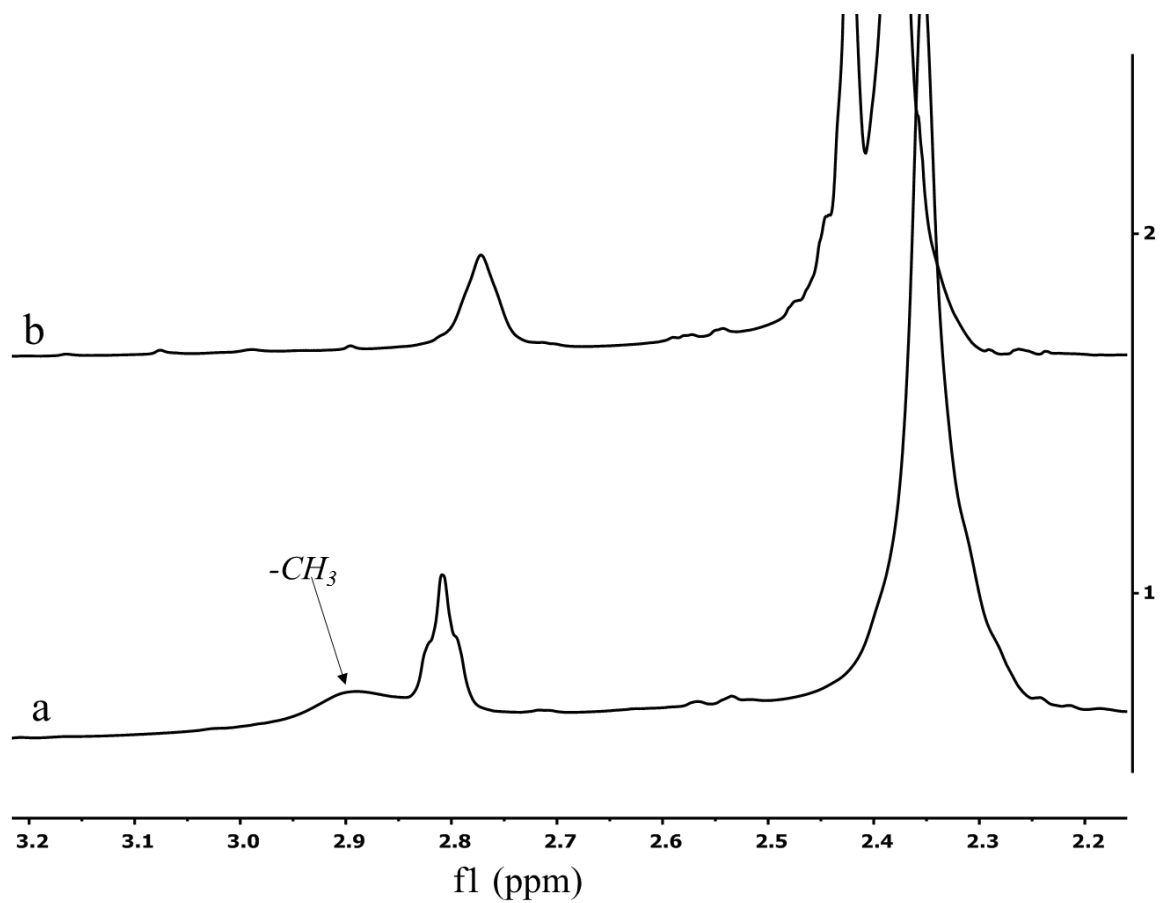

Figure S-10.  $^1\text{H}$  spectrum (a) N-PMHS **IV** and  $\text{Au}(\text{THT})\text{Cl}$  solution. Amine/Au=2.5 and (b) 10 minutes after addition of  $\text{Et}_3\text{SiH}$  to solution shown in curve a,  $\text{Et}_3\text{SiH}/\text{Au}=3$ . Spectrum showed that the peaks associated with  $-\text{CH}_3$  attached to N atom of amine bound to Au(I) was no longer detectable.

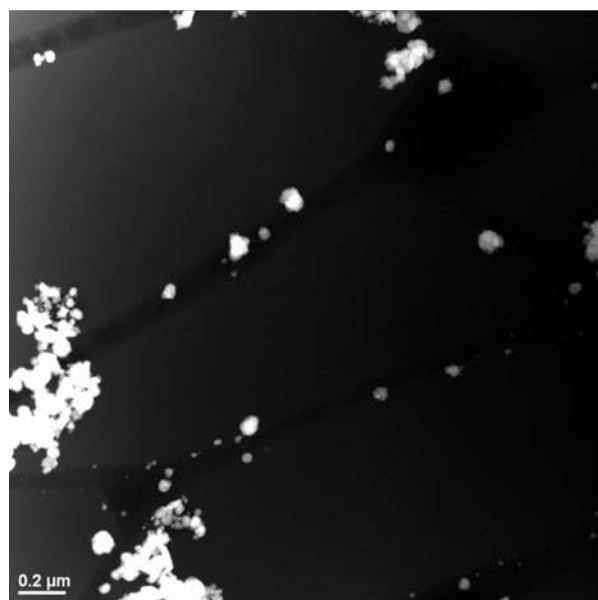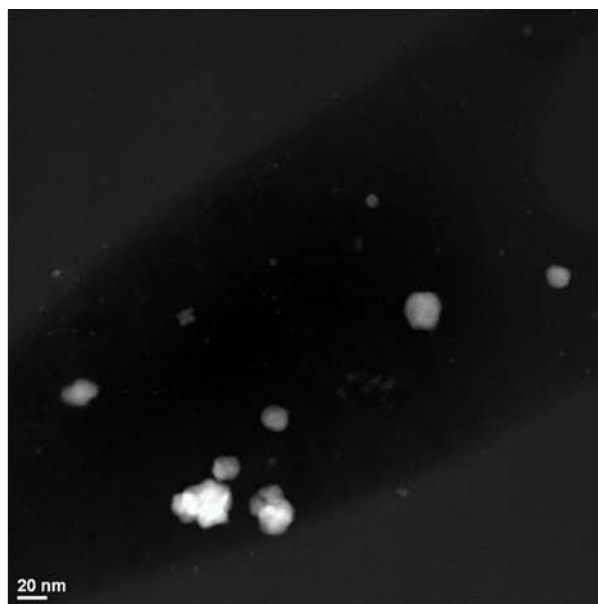

Fig. S-11 STEM images of Au-Me-SiH-PMHS

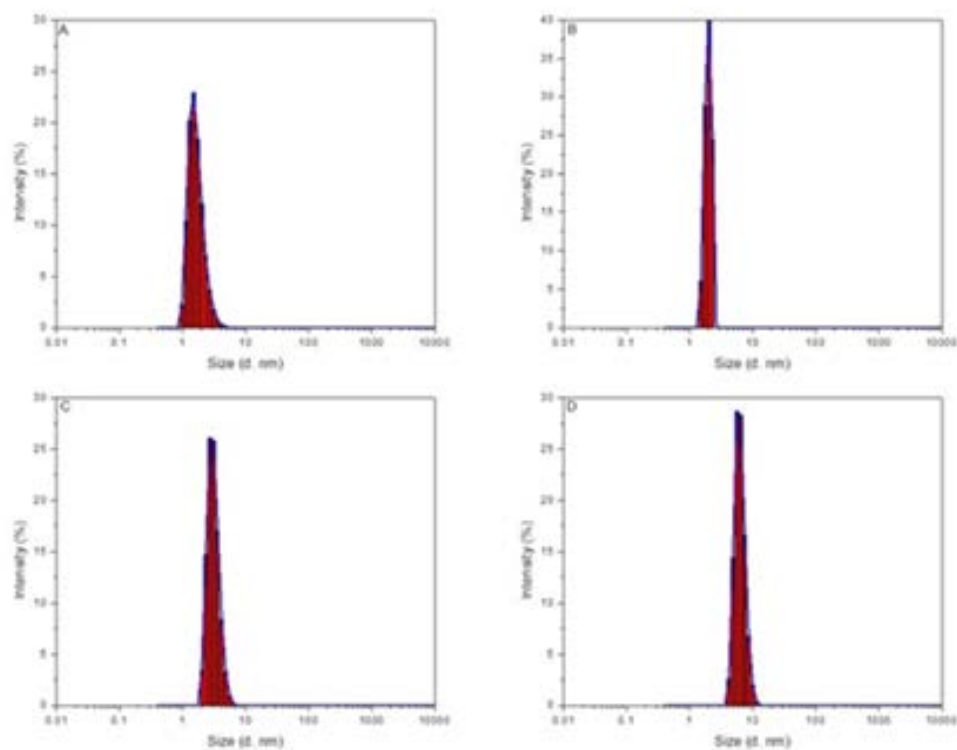

Fig. S-12 Size distribution of gold colloid determined by dynamic light scattering at room temperature for (mean particle size): A. (1.499 nm); B. (2.010 nm); C. (2.696 nm); and D. (5.615 nm). The samples A-D correspond to samples **a-d** listed in Table 1 of the main manuscript. Note that the x-axis is in log scale.



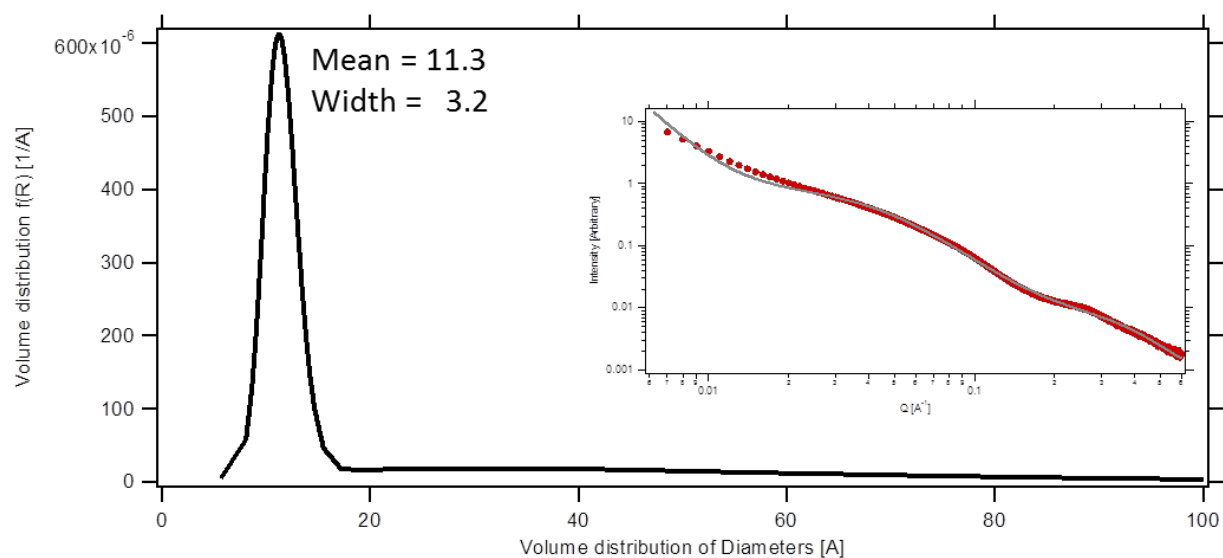

Fig. S-13 Size distribution of gold colloid determined by SAX of sample **a**. inset shows SAXS data and fitted results.

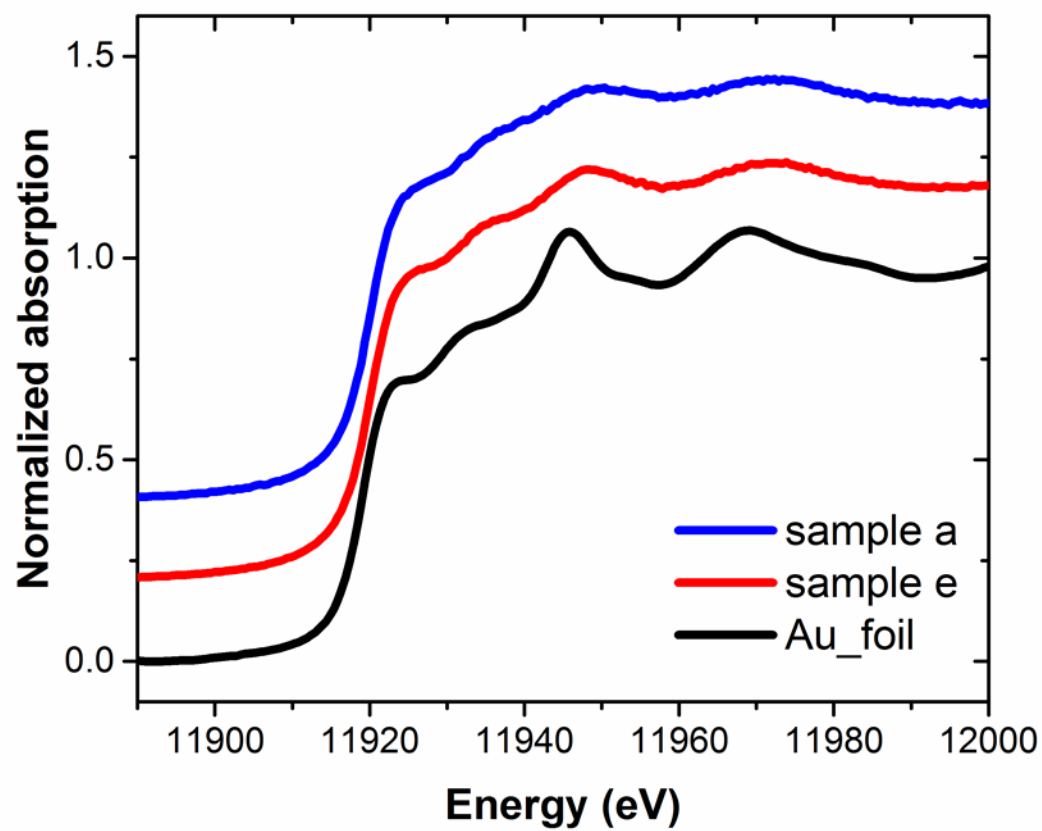

Fig. S-14 XANES spectrum of sample **a**, **e** and gold foil.

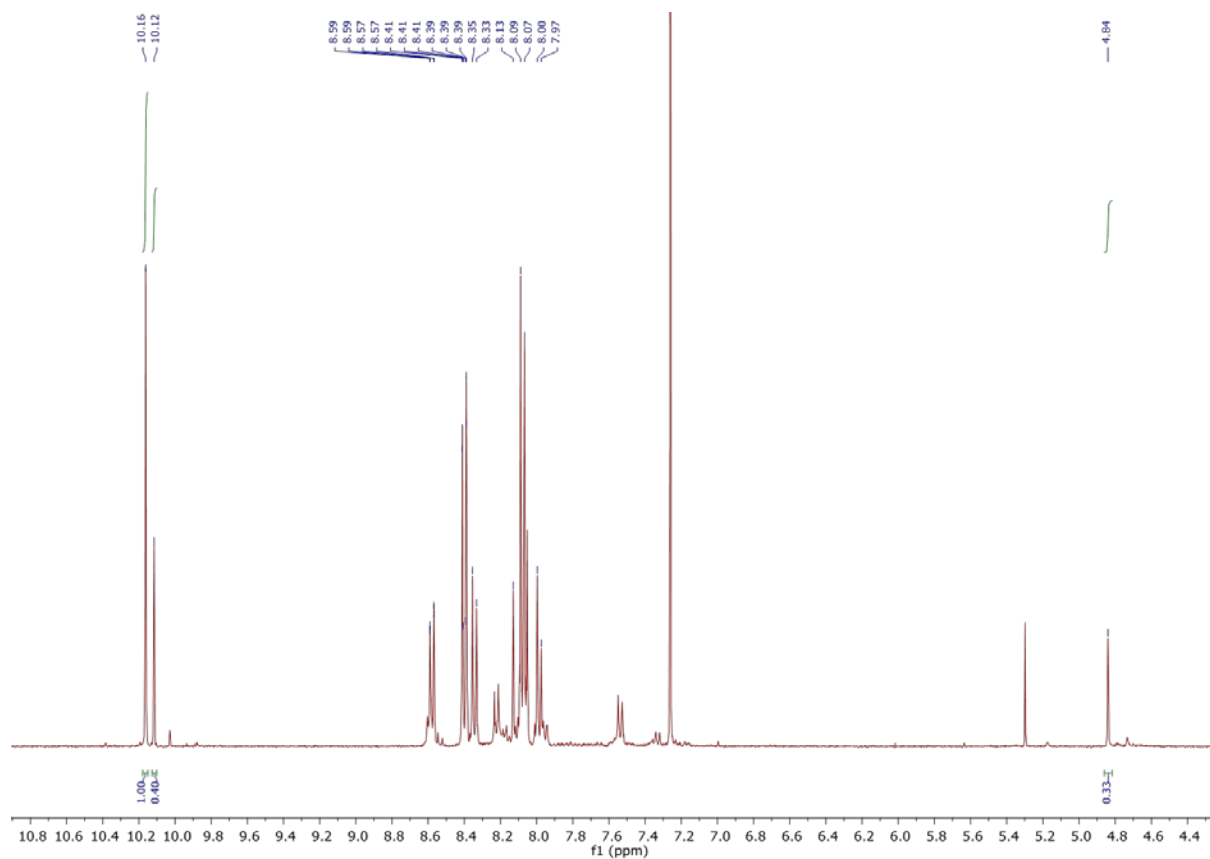

Fig. S-15 NMR spectrum of the products of catalytic conversion of p-nitrobenzaldehyde catalyzed by sample **a**. Calculations were done based on the CHO signal of the starting aldehyde at 10.16 ppm, imine product's CH=N at 10.12 ppm, and the alcohol's CH<sub>2</sub> at 4.84 ppm. Additionally analysis of the aromatic region showed no signs of other products. There is a CH<sub>2</sub>Cl<sub>2</sub> peak at 5.3 ppm.
